# Supplementary material for: UV photocatalytic activity of Au@ZnO core–shell nanostructure with enhanced UV emission
Source: Royal Society of Chemistry journal article supplement (doi:10.1039/c5ra11653h), 2015-01-01
Supplement: c5ra11653h1.pdf [file c5ra11653h1.pdf]

## Supplementary Information

### UV photocatalytic activity of Au@ZnO core-shell nanostructure with enhanced UV emission

Tingting Jiang, Xueying Qin, Ye Sun,\* and Miao Yu\*

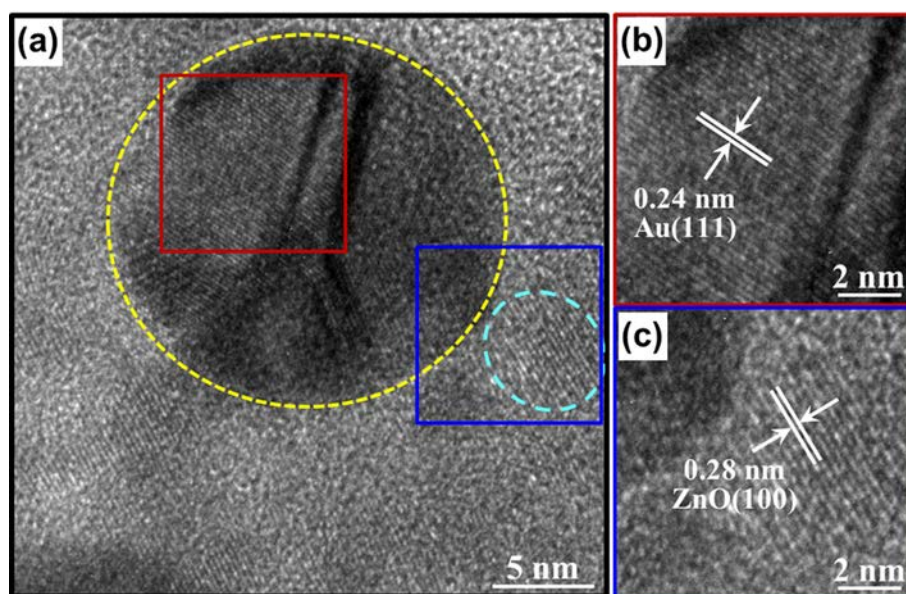

**Fig. S1** (a) HRTEM image of an AZ1 Au@ZnO nanostructure, showing (b) Au(111) crystal planes and (c) ZnO(100) crystal planes.

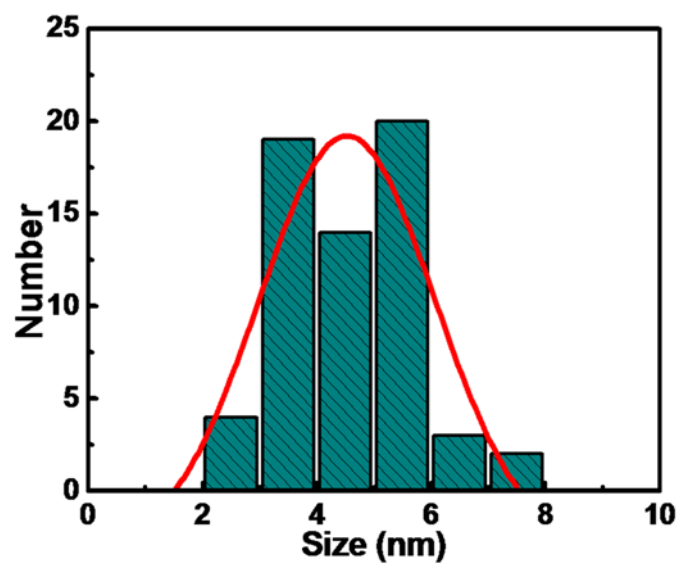

**Fig. S2.** Size distribution of the ZnO nanocrystallines in Au@ZnO nanostructures.

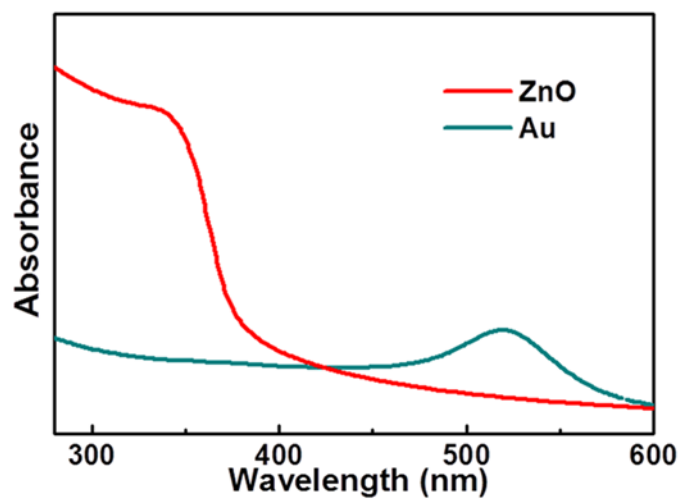

**Fig. S3.** UV-vis-NIR absorption spectra of pure Au and ZnO samples.

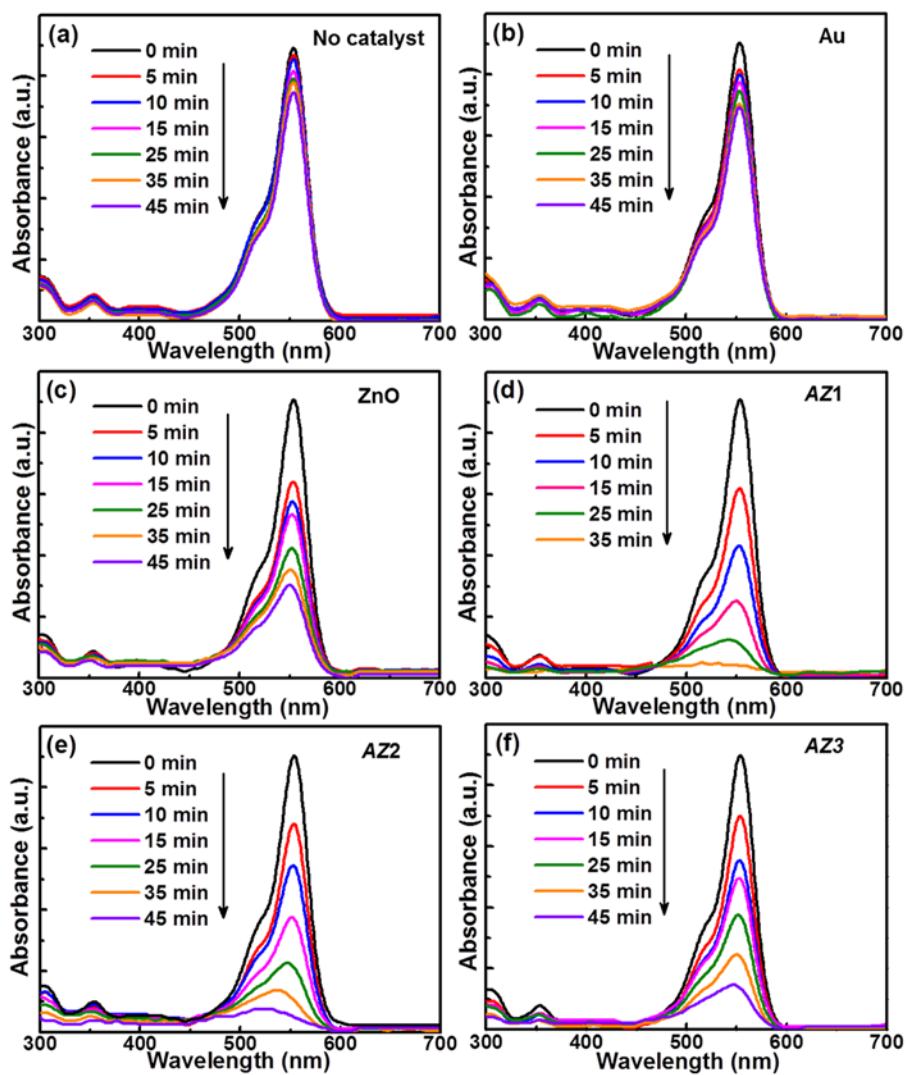

**Fig. S4** Temporal evolution of absorption spectra obtained during photocatalysis of RhB under the irradiation of UV light ( $\lambda = 365$  nm) with (a) no catalyst, (b) Au NPs, (c) pure ZnO, (d) AZ1, (e) AZ2, and (f) AZ3 samples.
